# Supplementary material for: Strigolactones Modulate Cellular Antioxidant Defense Mechanisms to Mitigate Arsenate Toxicity in Rice Shoots
Source: MDPI journal article supplement (doi:10.3390/antiox10111815), 2021-11-15
Supplement: s1 [file s1]

**Supplementary data:**

**Supplementary Table S1.** Primer sequences of reference and target genes used in the current study

| Purpose        | Name              | Forward (5'-3')          | Reverse (5'-3')                |
|----------------|-------------------|--------------------------|--------------------------------|
| Reference gene | <i>OsUBQ</i>      | GACGGACGCACCCTGGCTGACTAC | TGCTGCCAATTACCATATACCA<br>CGAC |
| Target genes   | <i>D10</i>        | CTGTACAAGTTCGAGTGGCACC   | CCTCGTCCGTCTCCTCGTAC           |
|                | <i>D17</i>        | CCTCGTCCAGAAGCGTGAG      | TAGTGGGTGTTCGGTGAAGGC          |
|                | <i>OsHAC1;1</i>   | TGAACAAGGGCCATCTACAC     | GACGAGAACTGCTCCACAAA           |
|                | <i>OsHAC1;2</i>   | TAGCATCTGCCGATCTCATA     | GAGGTTTATTACCGCAAGG            |
|                | <i>OsGSH1</i>     | TGTCATTTCCGGTCTCTTCC     | AAGGGCAAACCTCAGGAAAT           |
|                | <i>OsGSH2</i>     | GCTGGTCAGACTCCAGAAGG     | CCGCAAATAGGCTCCAAATA           |
|                | <i>OsPCS1</i>     | TCGACGATTTCTGTTTGCTG     | GTTTCATGGCTTCCCAAAGAA          |
|                | <i>OsABCC1</i>    | AACAGTGGCTTATGTTCTCAAG   | AACTCCTCTTTCTCCAATCTCTG        |
|                | <i>OsCuZnSOD1</i> | ATGCGTCTGTGTTGCTTCTG     | CCATCTCCCTCTTGGACAAA           |
|                | <i>OsCuZnSOD2</i> | GCGGTGAGTGACTTGTTTT      | TACGAGCGAACATGAACAGC           |
|                | <i>OsMnSOD2</i>   | TTTTGTGGGTGGGAAATCAT     | CACAGCAGCTCCATCCTACA           |
|                | <i>OsAPX1</i>     | CCAAGGGTTCTGACCACCTA     | CAAGGTCCCTCAAACCAGA            |
|                | <i>OsAPX2</i>     | TCAAGGACCAACTTCCCATC     | AGGGTGTGACCACCAGAAAG           |
|                | <i>OsGR2</i>      | AAGTGATTCCTCGCGCTAAA     | CTCGTCCTTGAGCATCTTCC           |
|                | <i>OsGR3</i>      | ATATGGGCTGTGGGTGATGT     | TGAAGCATCAAAATCGCAAG           |
|                | <i>OsGPX05</i>    | GATCTGGACCTCCTCACTCG     | CCTCATCCACCCTCTTTCAA           |
|                | <i>OsGSTU30</i>   | GAGGATCTCCGCAACAAGAG     | CGATATAGGCGGTCCAGAAG           |
|                | <i>OsGSTU37</i>   | GCTGAGTCTGCCGATAGAG      | ATTTATTCCCAGGTGGCACA           |
